# Supplementary material for: The role of mesenchymal stem cells in hematopoietic stem cell transplantation: prevention and treatment of graft-versus-host disease
Source: PubMed Central journal article supplement (PMC6588914; doi:10.1186/s13287-019-1287-9), 2019-06-21
Supplement: 13287_2019_1287_MOESM1_ESM.pdf [file 13287_2019_1287_MOESM1_ESM.pdf]

## **Additional file 1. Search strategy**

### **Medline (PubMed)**

- #1 "Mesenchymal Stromal Cells"[Mesh]
- #2 mesenchymal stromal cell\*
- #3 mesenchymal stem cell\*
- #4 MSC\*
- #5 #1 or #2 or #3 or #4
- #6 graft versus host disease[Mesh]
- #7 graft versus host disease
- #8 GVHD
- #9 #6 or #7 or #8
- #10 #5 and #9 Filters: clinical trial, comparative study

### **Cochrane Library**

- #1 MeSH descriptor: [Mesenchymal Stromal Cells] explode all trees
- #2 "mesenchymal stem cell\*":ti,ab,kw (Word variations have been searched)
- #3 mesenchymal stromal cell\* :ti,ab,kw (Word variations have been searched)
- #4 MSC:ti,ab,kw (Word variations have been searched)
- #5 #1 or #2 or #3 or #4
- #6 "graft versus host disease":ti,ab,kw (Word variations have been searched)
- #7 GVHD:ti,ab,kw (Word variations have been searched)
- #8 MeSH descriptor: [Graft vs Host Disease] explode all trees
- #9 #6 or #7 or #8
- #10 #5 and #9

### **EMBASE**

- #1 ('graft versus host disease'/exp OR 'graft versus host disease' OR (('graft'/exp OR graft) AND versus AND ('host'/exp OR host) AND ('disease'/exp OR disease)) OR 'gvhd':au) AND [controlled clinical trial]/lim
- #2 ('mesenchymal stem cell\*' OR (mesenchymal AND ('stem'/exp OR stem) AND cell\*) OR 'mesenchymal stromal cell\*' OR (mesenchymal AND stromal AND cell\*) OR msc) AND [controlled clinical trial]/lim
- #3 #1 and #2

### **SinoMed CBM**

((("mesenchymal stem cell\*" [unweighted: extension]) OR "multipotent stromal cell\*" [unweighted: extension]) OR "totipotential stem cell" [unweighted: extension]) AND "graft versus host disease" [unweighted: extension]

### **linicalTrials.gov**

"mesenchymal stem cell" and "graft versus host disease" |studies with Results
